# Supplementary material for: Genome‐wide identification of CpG island methylator phenotype related gene signature as a novel prognostic biomarker of gastric cancer
Source: PubMed Central journal article supplement (PMC7396145; doi:10.7717/peerj.9624), 2020-07-30
Supplement: peerj-08-9624-s002.pdf [file peerj-08-9624-s002.pdf]

A

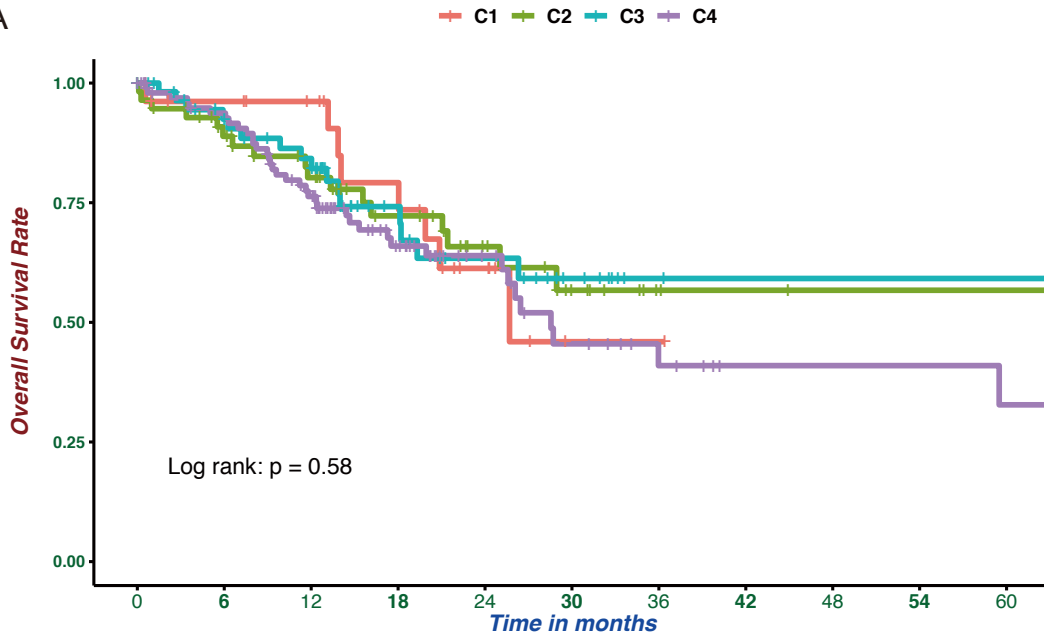

Number at risk

|    |     |    |    |    |    |    |   |   |   |   |   |
|----|-----|----|----|----|----|----|---|---|---|---|---|
| C1 | 27  | 22 | 19 | 14 | 7  | 1  | 1 | 0 | 0 | 0 | 0 |
| C2 | 57  | 45 | 36 | 25 | 16 | 9  | 3 | 2 | 1 | 1 | 1 |
| C3 | 58  | 47 | 40 | 21 | 15 | 9  | 3 | 2 | 2 | 2 | 2 |
| C4 | 102 | 88 | 66 | 38 | 23 | 14 | 9 | 5 | 5 | 5 | 4 |

B

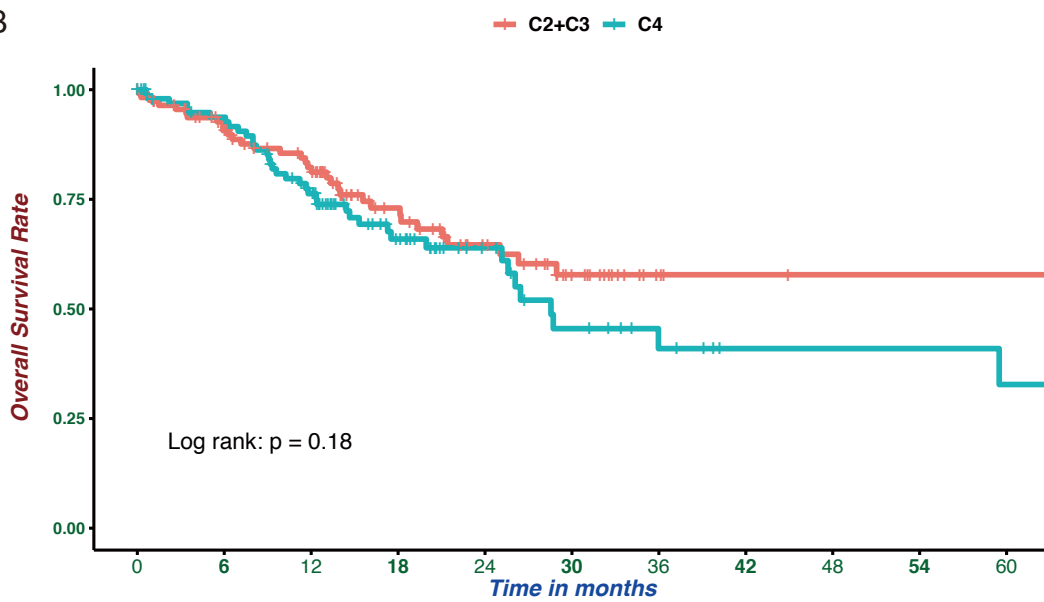

Number at risk

|       |     |    |    |    |    |    |   |   |   |   |   |
|-------|-----|----|----|----|----|----|---|---|---|---|---|
| C2+C3 | 115 | 92 | 76 | 46 | 31 | 18 | 6 | 4 | 3 | 3 | 3 |
| C4    | 102 | 88 | 66 | 38 | 23 | 14 | 9 | 5 | 5 | 5 | 4 |
