# Supplementary material for: Genome‐wide identification of CpG island methylator phenotype related gene signature as a novel prognostic biomarker of gastric cancer
Source: PubMed Central journal article supplement (PMC7396145; doi:10.7717/peerj.9624), 2020-07-30

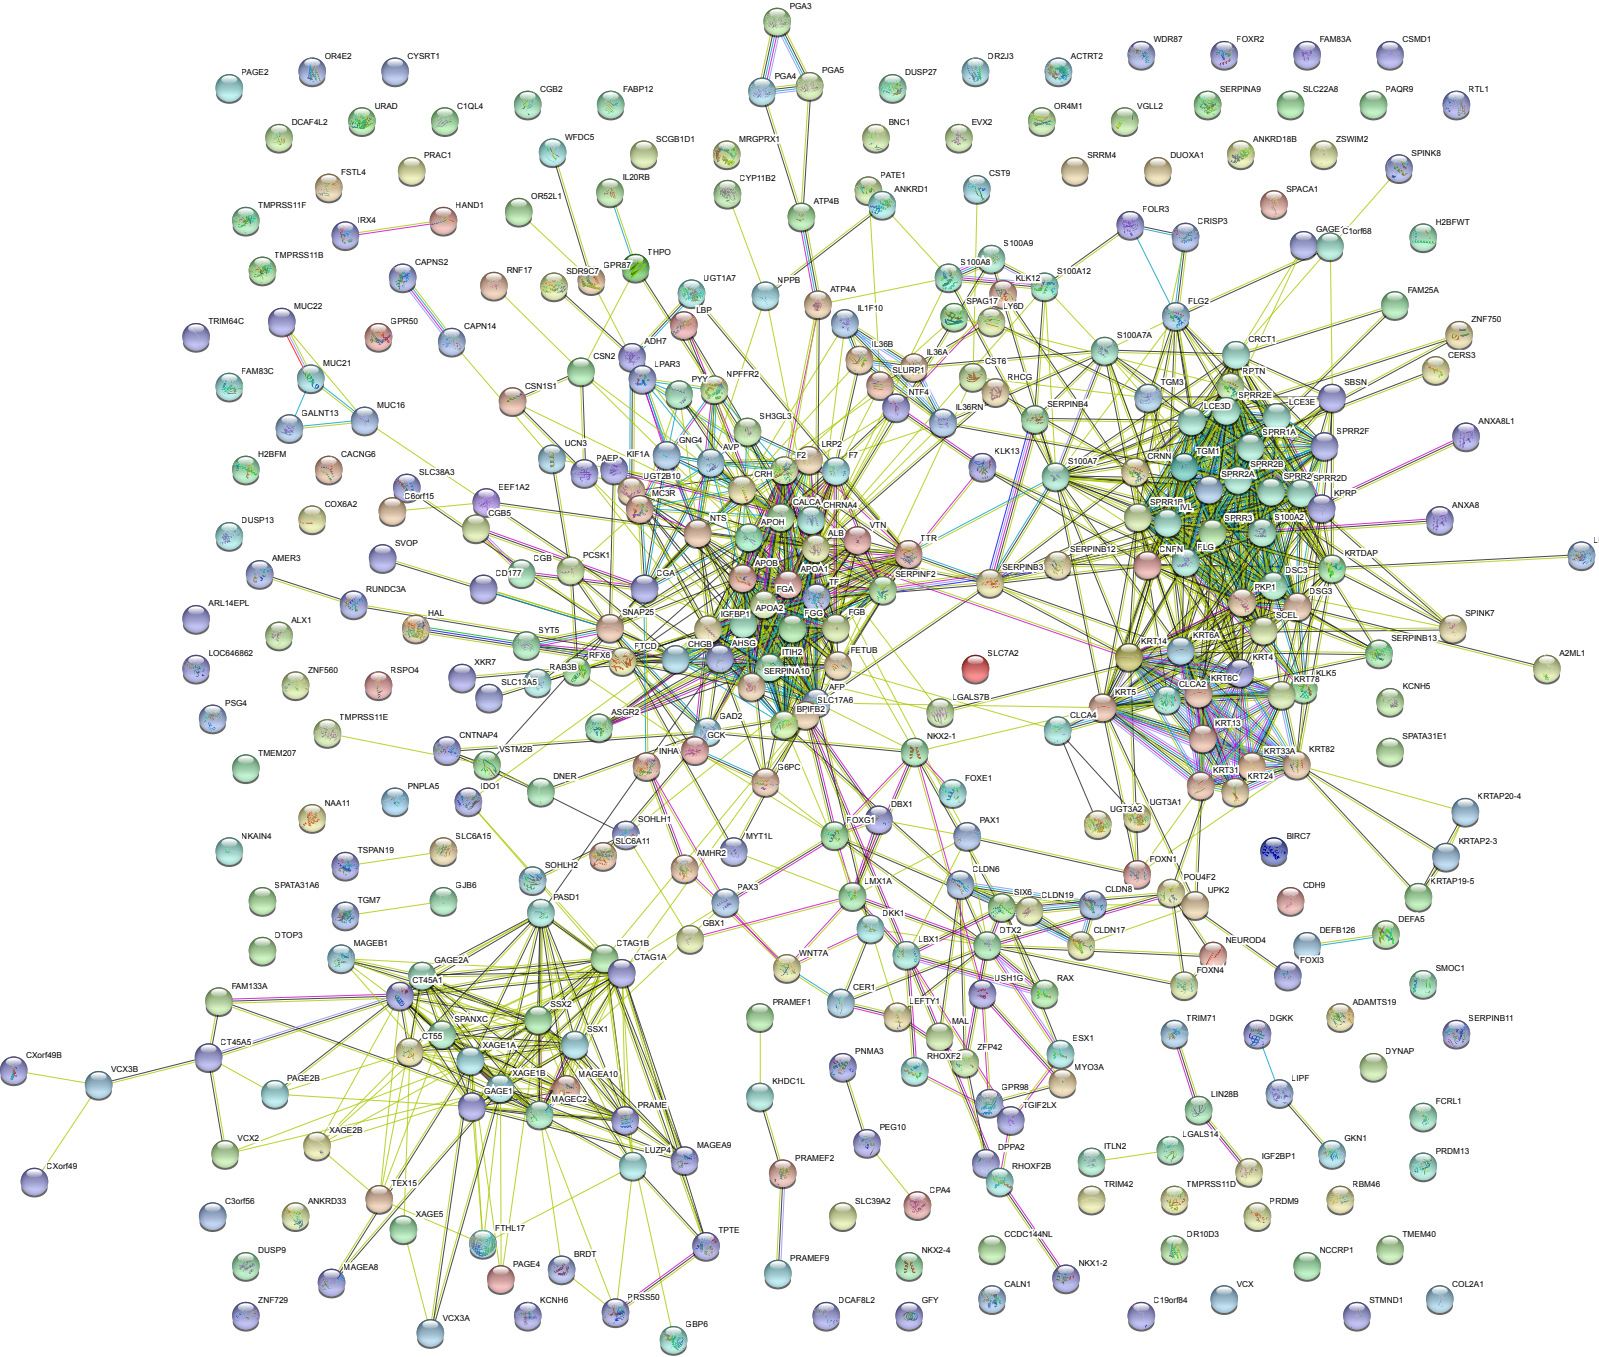

Supplement: peerj-08-9624-s003.pdf [file peerj-08-9624-s003.pdf]
